# $\beta$ -Catenin regulates *Cripto*- and *Wnt3*-dependent gene expression programs in mouse axis and mesoderm formation

Markus Morkel<sup>1</sup>, Joerg Huelsken<sup>1</sup>, Maki Wakamiya<sup>2</sup>, Jixiang Ding<sup>3</sup>, Marc van de Wetering<sup>4</sup>, Hans Clevers<sup>4</sup>, Makoto M. Taketo<sup>5</sup>, Richard R. Behringer<sup>2</sup>, Michael M. Shen<sup>3</sup> and Walter Birchmeier<sup>1,\*</sup>

<sup>1</sup>Max Delbrueck Center for Molecular Medicine, Robert-Roessle-Strasse 10, 13125 Berlin, Germany

<sup>2</sup>Department of Molecular Genetics, The University of Texas, M. D. Anderson Cancer Center, Houston, TX 77030, USA

<sup>3</sup>Center for Advanced Biotechnology and Medicine and Dept. of Pediatrics, UMDNJ-Robert Wood Johnson Medical School, 679 Hoes Lane, Piscataway, NJ 08854, USA

<sup>4</sup>Department of Immunology, University Hospital Utrecht, NL-3584 CX Utrecht, The Netherlands

<sup>5</sup>Department of Pharmacology, Kyoto University Graduate School of Medicine, Yoshida-Konoe-cho, Sakyo-ku, Kyoto 606-8501, Japan

\*Author for correspondence (e-mail: wbirch@mdc-berlin.de)

Accepted 10 September 2003

Development 130, 6283-6294

Published by The Company of Biologists 2003

doi:10.1242/dev.00859

## Summary

Gene expression profiling of  $\beta$ -catenin, *Cripto* and *Wnt3* mutant mouse embryos has been used to characterise the genetic networks that regulate early embryonic development. We have defined genes whose expression is regulated by  $\beta$ -catenin during formation of the anteroposterior axis and the mesoderm, and have identified *Cripto*, which encodes a Nodal co-receptor, as a primary target of  $\beta$ -catenin signals both in embryogenesis as well as in colon carcinoma cell lines and tissues. We have also defined groups of genes regulated by *Wnt3*/ $\beta$ -catenin

signalling during primitive streak and mesoderm formation. Our data assign a key role to  $\beta$ -catenin upstream of two distinct gene expression programs during anteroposterior axis and mesoderm formation.

Supplementary data available online

Key words: Microarray, Anteroposterior axis, Gastrulation, Signalling pathways, TdGF1, Nanog

## Introduction

Tissue and organ development of vertebrates is tightly regulated by signalling cascades that act in a spatially and temporarily controlled manner (for reviews, see Beddington and Robertson, 1999; Jessell, 2000; Capdevila and Izpisua Belmonte, 2001). Prominent examples of these tightly controlled signalling pathways include the canonical *Wnt*/ $\beta$ -catenin and the *TGF $\beta$* /*Nodal* signalling pathways, both of which play multiple essential roles in early embryogenesis.

The formation of the primary body axes during early embryogenesis is controlled in many organisms by canonical *Wnt*/ $\beta$ -catenin signal transduction (reviewed by Sokol, 1999; De Robertis et al., 2000). The expression of *Wnt* target genes is regulated by nuclear  $\beta$ -catenin that is bound to transcription factors of the *Lef/Tcf* family (Behrens et al., 1996; Molenaar et al., 1996; He et al., 1998; Tetsu and McCormick, 1999). In *Xenopus*, depletion of  $\beta$ -catenin mRNA interferes with the formation of the dorsoanterior axis, while injection of *Wnt* mRNA promotes axis formation (Smith and Harland, 1991; Sokol et al., 1991; Heasman et al., 1994). In zebrafish, misexpression of *Wnt* receptors, or mutations in *Axin* or *Ichabod*, which encode a  $\beta$ -catenin scaffolding protein and a regulator of  $\beta$ -catenin localisation, modulate the function of the dorsal organiser and impair the formation of the anteroposterior axis (Nasevicius et al., 1998; Kelly et al., 2000; Heisenberg et al., 2001). In the mouse, ablation of  $\beta$ -catenin

results in failure to orient the anteroposterior axis (Huelsken et al., 2000), i.e. the movement of an anterior signalling centre from the distal to the anterior visceral endoderm does not occur (Thomas and Beddington, 1996). Studies employing chimeras between mutant and wild-type embryos indicate that  $\beta$ -catenin acts in the embryonic ectoderm at this developmental step.

Signals provided by the *TGF- $\beta$* /*Nodal* pathway are also essential for the formation of the primary body axes (reviewed by De Robertis et al., 2000; Whitman, 2001). *Nodal* signals are transduced via *Smads*, which accumulate in the nucleus, interact with other transcription factors, and regulate gene expression (Chen et al., 1996; Liu et al., 1996; Zhang et al., 1996; Watanabe and Whitman, 1999). *Cripto*, an essential co-receptor of *Nodal*, acts together with *activin* receptors to transmit the *Nodal* signal via *Smad2* and *Smad3* (Gritsman et al., 1999; Yeo and Whitman, 2001; Kumar et al., 2001; Yan et al., 2002). Previous studies have shown a requirement for *Nodal* signalling in anteroposterior axis formation in both zebrafish and mice. In particular, zebrafish that carry double mutations in the *cyclops* and *squint* genes, which encode *Nodal*-related ligands, display a mispositioned anteroposterior axis (Feldman et al., 1998). In the mouse, *Nodal* mutants lack a proximodistal axis as indicated by the absence of the signalling centres in extra-embryonic ectoderm and visceral endoderm, and as a consequence, do not form an anteroposterior axis (Conlon et al., 1994; Varlet et al., 1997;

Brennan et al., 2001). Mutants of *Cripto* establish a proximodistal axis, but fail to position the nascent anteroposterior axis in the correct orientation (Ding et al., 1998). Thus, in early mouse embryogenesis, Nodal signals are required for the formation of the anteroposterior axis, but its co-receptor *Cripto* is required only for the proper positioning of the anteroposterior axis. Whether  $\beta$ -catenin and Nodal/*Cripto* act in the same or in parallel pathways during the formation and positioning of the anteroposterior axis has been unclear.

Subsequently, Wnt/ $\beta$ -catenin and TGF- $\beta$  signals regulate the formation of the vertebrate mesoderm. In *Xenopus*, ectodermal expression of factors of the TGF $\beta$  family induces mesoderm (reviewed by De Robertis et al., 2000; Kimelman and Griffin, 2000), and TGF $\beta$  and Wnt signals cooperate to induce expression of brachyury that specifies mesoderm (Vonica and Gumbiner, 2002). In the mouse, *Wnt3* mutants lack a primitive streak and mesoderm, but form the anteroposterior axis (Liu et al., 1999). In cultured epithelial cells, *Wnt3* signals are transmitted via  $\beta$ -catenin, suggesting that *Wnt3* uses the canonical Wnt/ $\beta$ -catenin pathway (Shimizu et al., 1997). Brachyury is expressed in the mesoderm, and is a direct transcriptional target for canonical Wnt/ $\beta$ -catenin signals (Yamaguchi et al., 1999; Arnold et al., 2000; Galceran et al., 2001). *Nodal* mutant mice lack a primitive streak and only rarely form patches of mesoderm (Conlon et al., 1994), and experiments employing chimeric embryos indicate that these essential Nodal signals are generated in the epiblast (Varlet et al., 1997). By contrast, *Cripto* mutants do form mesoderm that arises at an ectopic position (Ding et al., 1998). Thus, the comparison of *Wnt3* and *Cripto* mutants indicates that formation of the anteroposterior axis and of mesoderm can occur independently of each other. However,  $\beta$ -catenin is required in both processes.

In the adult, deregulation of both Wnt/ $\beta$ -catenin and TGF- $\beta$  signals play important roles in the establishment and progression of cancer. Mutations in *Apc* (Grodin et al., 1991; Kinzler et al., 1991), which encodes a regulator of  $\beta$ -catenin stability, or in  $\beta$ -catenin (Morin et al., 1997; Rubinfeld et al., 1997) are found in the majority of human colorectal cancers (reviewed by Polakis, 2000). Mutations in *Axin* and conductin (now known as *Axin2*), which encode scaffolding proteins of the  $\beta$ -catenin degradation complex, have been identified in medulloblastomas and colorectal carcinomas (Liu et al., 2000; Satoh et al., 2000; Dahmen et al., 2001). Genes that encode proteins of the TGF $\beta$  signalling pathway act as tumour suppressor genes: *Smad2* and *Smad4* in human colorectal cancer (Eppert et al., 1996; Thiagalingam et al., 1996), and *Tgfb2* in colon tumours with microsatellite instability (Markowitz et al., 1995). The Nodal co-receptor *Cripto* is overexpressed in many colon carcinomas and can transform fibroblasts and epithelial cells (Niemeyer et al., 1998; Salomon et al., 2000).

Target genes of  $\beta$ -catenin during formation of the anteroposterior axis and the mesoderm have not been analyzed in a systematic and genome-wide manner. Using microarray technology, we identify *Cripto*, which encodes a Nodal co-receptor, as a primary target of  $\beta$ -catenin. This defines the basis of a novel molecular interaction between Nodal and  $\beta$ -catenin signalling pathways in early embryogenesis. Interestingly, *Cripto* expression in the early embryo and in tumours depends

on  $\beta$ -catenin signals. Comparison of the genome-wide expression profiles of  $\beta$ -catenin, *Cripto* and *Wnt3* mutant embryos results in the identification of novel genes that are active during formation of the anteroposterior axis and of the mesoderm.

## Materials and methods

### Mouse mutants

$\beta$ -catenin-, *Cripto*- and *Wnt3*-deficient mice have been described previously (Ding et al., 1998; Liu et al., 1999; Huelsken et al., 2000). Mouse embryos were staged according to standard criteria: E6.0 was defined as strictly pre-streak, and embryos displaying signs of streak formation were not used for analysis. E6.5 was defined as early streak stage; only early streak stage wild type embryos and mutant littermates were used for analysis. Mice carrying an allele of  $\beta$ -catenin that contains *loxP* sites flanking exon 3 (Harada et al., 1999) were crossed with mice expressing Cre recombinase under the control of the CMV promoter (Nagy et al., 1998) to obtain gain-of-function mutants. All mouse embryos were genotyped by PCR (Ding et al., 1998; Liu et al., 1999; Huelsken et al., 2000; Soshnikova et al., 2003). In situ hybridisation was performed as previously described (Huelsken et al., 2000). To generate gene expression profiles of isolated embryonic tissues, wild-type embryos were dissected at mid-streak stage, using a combination of mechanical and enzymatic means (Harrison et al., 1995).

### Microarray analysis

RNA and genomic DNA were isolated from single mouse embryos, using Trizol (GibcoBRL), according to the manufacturer's instructions. RNA was reverse transcribed using a T7-promoter tagged polyT primer, and antisense RNA was produced using T7 RNA polymerase. Antisense RNA was examined by gel electrophoresis, and equivalent amounts of RNA from three to five age-matched embryos of the same genotype were pooled to generate a microarray probe. Probes were biotin-labeled in a second round of T7 amplification, as previously described (Luo et al., 1999). Profiles of  $\beta$ -catenin-, *Cripto*- and *Wnt3*-deficient mice were compared with profiles of wild-type littermates of the same genetic background. Microarray profiling was performed in triplicate from independent preparations of embryonic RNA using Affymetrix Mu11k GeneChips (11,000 sequences). Isolated tissue domains were profiled in duplicate using MG-U74A GeneChips (8,000 sequences).

GeneChip image analysis, data normalisation and comparative analysis were performed using the statistical algorithm of Affymetrix Microarray Suite (MAS) 5.0 software following the manufacturer's guidelines. Ranking and filtering of genes was performed using Microsoft Excel.  $\beta$ -Catenin-responsive genes were defined as genes that changed expression more than twofold, with a Change p-Value limit of 0.1 in cross-wise comparative analyses. Genes commonly deregulated in  $\beta$ -catenin and either *Cripto* or *Wnt3* mutants were defined as genes that changed expression greater than twofold, or with a Change p-Value limit of 0.1. GeneChip data of isolated tissues were normalised and visualised using Silicon Genetics GeneSpring software. The significance of the overlap between genes deregulated in both  $\beta$ -catenin and *Cripto* or *Wnt3* mutants was calculated using the hypergeometric distribution function (Feller, 1968). The microarray data set is available on our website <http://www.mdc-berlin.de/~zelldiff>

### Tissue culture

Ls174T cells that express tetracycline-inducible, dominant-negative Tcf4 have been described before (van de Wetering et al., 2002). For northern blot analysis, RNA was isolated using Trizol (GibcoBRL) before and 12 hours after induction with 1  $\mu$ g/ml doxycyclin. For  $\beta$ -catenin-Tcf4-dependent reporter assays, 293T cells were transfected

by calcium phosphate/DNA co-precipitation with 1 µg reporter constructs, 0.1 or 0.4 µg Tcf4-β-catenin-fusion-construct, 1 µg pSV-β-Gal-Plasmid, and empty pCMVneo to 4 µg DNA per well. Transfections and measurements were performed in triplicate.

**Plasmid construction**

*Cripto* enhancer sequences were amplified from a cosmid clone using the primer sequences 5'-AAT CAC TTT GCC ACC CTG TC-3' and 5'-ACT GCG CAG AAG CTG ATG G-3' and cloned into the *Sall*-sites of FOPflash (Molenaar et al., 1996) to replace the FOP sites. Putative Lef/Tcf-binding sites were mutated using PCR mutagenesis and the primer sequences 5'-GGG CGA TAA ATC AAC TGC GTT TGT GTC CTC TTC TGG-3', 5'-GTC CTC CGG AAT CCT CCG ATT CCT TCG AGA GGA C-3', 5'-GTC CTC TCC ATG TGC TGC GAT GGC TGG CTA GAT-3' (mutated nucleotides are underlined). *Cripto* 5' flanking sequences were amplified using the primer sequences 5'-GCC AGT GTG GAC AAG TCC TG-3' and 5'-CTT CGA CGG CTC GTA AAA AC-3' and cloned into the *Sall* site of pBL-luc.

**Results**

**Expression profiling of β-catenin mutant embryos**

To define the roles of β-catenin in the formation of the anteroposterior axis and the mesoderm, we compared gene expression profiles of wild-type and β-catenin mutant embryos. To this end, litters from β-catenin heterozygous intercrosses were dissected, and RNA from pools of wild-type and β-catenin mutant embryos was examined using Affymetrix GeneChips.

We found that 106 and 60 genes are deregulated in β-catenin<sup>-/-</sup> embryos at E6.0 and E6.5, respectively, corresponding to the stages at which the anteroposterior axis and the mesoderm are formed (for selected genes see Table 1, for a complete list see Table S1 at <http://dev.biologists.org/supplemental/>). The profiling data do not provide information whether these genes are modulated directly or indirectly by β-catenin. Many genes that are modulated in β-catenin<sup>-/-</sup> embryos encode signalling molecules or transcription factors. Remarkably, *Cripto* is the most prominently downregulated gene at E6.0, and we provide evidence below that *Cripto* may be a direct transcriptional target of β-catenin. We also find deregulated expression of *Msx1*, *Tm7Sfl*, *Tssc3* (*Phlda2* – Mouse Genome Informatics) *Afp*, *Sfrp1*, *Fas1* (*Tnfsf6* – Mouse Genome Informatics), *Sim2*, *Neurod1*, *Frz7* and other genes at this stage. Among these, *Msx1* and *Frz7* have previously been identified to be regulated by β-catenin, but it is not known whether this regulation is direct or indirect (Willert et al., 2002; Kielman et al., 2002).

At E6.5, we find downregulation of brachyury, *Eomes*, *Fgf8* and *Evx1* in β-catenin<sup>-/-</sup> embryos; these genes have known functions in mesoderm development (Wilkinson et al., 1990; Dush and Martin, 1992; Sun et al., 1999; Russ et al., 2000). Brachyury has been shown to be a direct transcriptional target of β-catenin (Yamaguchi et al., 1999; Arnold et al., 2000; Galceran et al., 2001). Other genes are also downregulated or absent. In particular, we noted the downregulation of the *Nanog* homeobox gene, which is essential for maintenance of embryonic stem cells (Chambers et al., 2003; Mitsui et al., 2003). We do not see changes in the expression of regulators of cell proliferation and the cell cycle, which have previously been shown to be β-catenin targets, i.e. *Ccnd1* (the gene

**Table 1. Genes that are deregulated in β-catenin<sup>-/-</sup> embryos at E6.0 and E6.5, as determined by microarray analysis**

| GenBank ID                   | Name                    | Suggested molecular function | Fold change | Confidence (Change p) |
|------------------------------|-------------------------|------------------------------|-------------|-----------------------|
| <b>Downregulated at E6.0</b> |                         |                              |             |                       |
| m87321                       | <i>Cripto (Tdgf1)</i>   | Signal transducer            | -3.8        | 0.001                 |
| x59251                       | <i>Msx1</i>             | Transcription factor         | -2.7        | 0.05                  |
| aa177300                     | <i>Tm7Sfl</i>           | Signal transducer            | -2.3        | 0.005                 |
| af002708                     | <i>Tssc3 (Ipl)</i>      |                              | -2.1        | 0.001                 |
| <b>Upregulated at E6.0</b>   |                         |                              |             |                       |
| af023873                     | <i>Sim2</i>             | Transcription factor         | +6.2        | 0.1                   |
| x12761                       | <i>Jun</i>              | Transcription factor         | +5.4        | 0.001                 |
| af031896                     | <i>Cer1</i>             | Signal transducer            | +3.8        | 0.001                 |
| u43320                       | <i>Frz7</i>             | Signal transducer            | +3.4        | 0.05                  |
| v00743                       | <i>Afp</i>              | Fetal serum protein          | +3.0        | 0.001                 |
| m55512                       | <i>Wt1</i>              | Transcription factor         | +2.6        | 0.001                 |
| u88566                       | <i>Sfrp1</i>            | Signal transducer            | +2.6        | 0.01                  |
| u63146                       | <i>Rbp4</i>             | Signal transducer            | +2.4        | 0.001                 |
| u06948                       | <i>Fas (Tnfsf6)</i>     | Signal transducer            | +2.4        | 0.05                  |
| u28068                       | <i>Neurod1</i>          | Transcription factor         | +2.3        | 0.1                   |
| x70298                       | <i>Sox4</i>             | Transcription factor         | +2.0        | 0.05                  |
| <b>Downregulated at E6.5</b> |                         |                              |             |                       |
| m87321                       | <i>Cripto (Tdgf1)</i>   | Signal transducer            | -9.6        | 0.001                 |
| x59387                       | <i>Trh</i>              | Signal transducer            | -6.4        | 0.001                 |
| x51683                       | <i>Brachyury (T)</i>    | Transcription factor         | -4.6        | 0.001                 |
| c81509                       | <i>Nanog (Enk)</i>      | Transcription factor         | -3.6        | 0.001                 |
| x54239                       | <i>Evx1</i>             | Transcription factor         | -3.2        | 0.05                  |
| d12482                       | <i>Fgf8</i>             | Signal transducer            | -3.0        | 0.05                  |
| x59251                       | <i>Msx1</i>             | Transcription factor         | -2.2        | 0.05                  |
| d49473                       | <i>Sox17</i>            | Transcription factor         | -2.2        | 0.05                  |
| aa174489                     | <i>Eomes</i>            | Transcription factor         | -2.1        | 0.001                 |
| <b>Upregulated at E6.5</b>   |                         |                              |             |                       |
| m28021                       | <i>Hoxa5</i>            | Transcription factor         | +4.9        | 0.05                  |
| m15131                       | <i>Il1b</i>             | Signal transducer            | +3.7        | 0.05                  |
| v00743                       | <i>Afp</i>              | Fetal serum protein          | +2.8        | 0.001                 |
| m35523                       | <i>Crabp2</i>           | Signal transducer            | +2.8        | 0.001                 |
| u22399                       | <i>p57KIP2 (Cdkn1c)</i> | Signal transducer            | +2.5        | 0.001                 |
| x54149                       | <i>Gadd45b</i>          | Signal transducer            | +2.0        | 0.005                 |

Genes were annotated using the Affymetrix Netaffx database, Mouse Genome Informatics database, NCBI Unigene database and PubMed searches. The average fold change and the upper limit of the Change p-Values are given, as calculated by Affymetrix MAS 5.0 software. Selected genes with a role in signalling or proposed function in embryonic development are shown. Genes whose differential expression was confirmed by in situ hybridisation are indicated in bold.

encoding cyclin D1) or *Myc* (He et al., 1998; Tetsu and McCormick, 1999; Shtutman et al., 1999). However, we find increased expression of *p57KIP2* (*Cdkn1c* – Mouse Genome Informatics) in β-catenin mutants at E6.5, which codes for a negative regulator of cell proliferation (Lee et al., 1995). It is unlikely that upregulated genes are directly controlled by β-catenin signalling, as loss of the transcriptional activator β-catenin should lead to downregulation of direct target genes. We find little overlap of β-catenin controlled genes in the embryo and those regulated by Wnt3a in teratocarcinoma cells (Willert et al., 2002).

In control studies, we also examined transcriptional changes that occur between E6.0 and E6.5 in wild-type embryos during normal development. We found that 130 genes are downregulated at E6.5 in wild type, and of these, 127 were also downregulated in β-catenin mutants (Fig. 1A). In addition, 673

**Fig. 1.** Expression of genes that are deregulated in  $\beta$ -catenin<sup>-/-</sup> embryos, as determined by microarray analysis. (A) Transcriptional changes that occur between E6.0 and E6.5 in wild-type embryos, and comparison with  $\beta$ -catenin mutants. The expression of 130 genes is downregulated, and expression of 673 genes is upregulated in wild-type embryos between these two stages. In  $\beta$ -catenin<sup>-/-</sup> embryos, most genes are similarly modulated (green; 127 are also downregulated and 591 are also upregulated). A minority of genes are oppositely regulated (red; three genes are downregulated and 82 genes upregulated).

(B) Upper panel: dissection scheme for separation of embryonic tissues. X, extra-embryonic tissues (green); VE, visceral endoderm (yellow); EE, embryonic ectoderm including primitive streak region (blue); M, mesoderm (red). Lower panel: assessment of the expression of genes that are known to be expressed in a tissue-specific manner.

*Pou5f1* is expressed in EE, brachyury (*T*) in EE and M, *Cer1* in VE, and *Bmp4* in X (Wilkinson et al., 1990; Rosner et al., 1990; Belo et al., 1997; Lawson et al., 1999). Red, high relative expression; blue, low relative expression; bright area, genes with consistent measurements; dark area, genes with variable or low measurements in certain tissues. (C) Assessment of the tissue specificity of expression of genes that are deregulated in  $\beta$ -catenin<sup>-/-</sup> embryos, as determined by expression profiling. Genes that are deregulated at E6.0 or E6.5 greater than twofold (Change p-Value < 0.05) are displayed. Names of selected genes are indicated on the right.

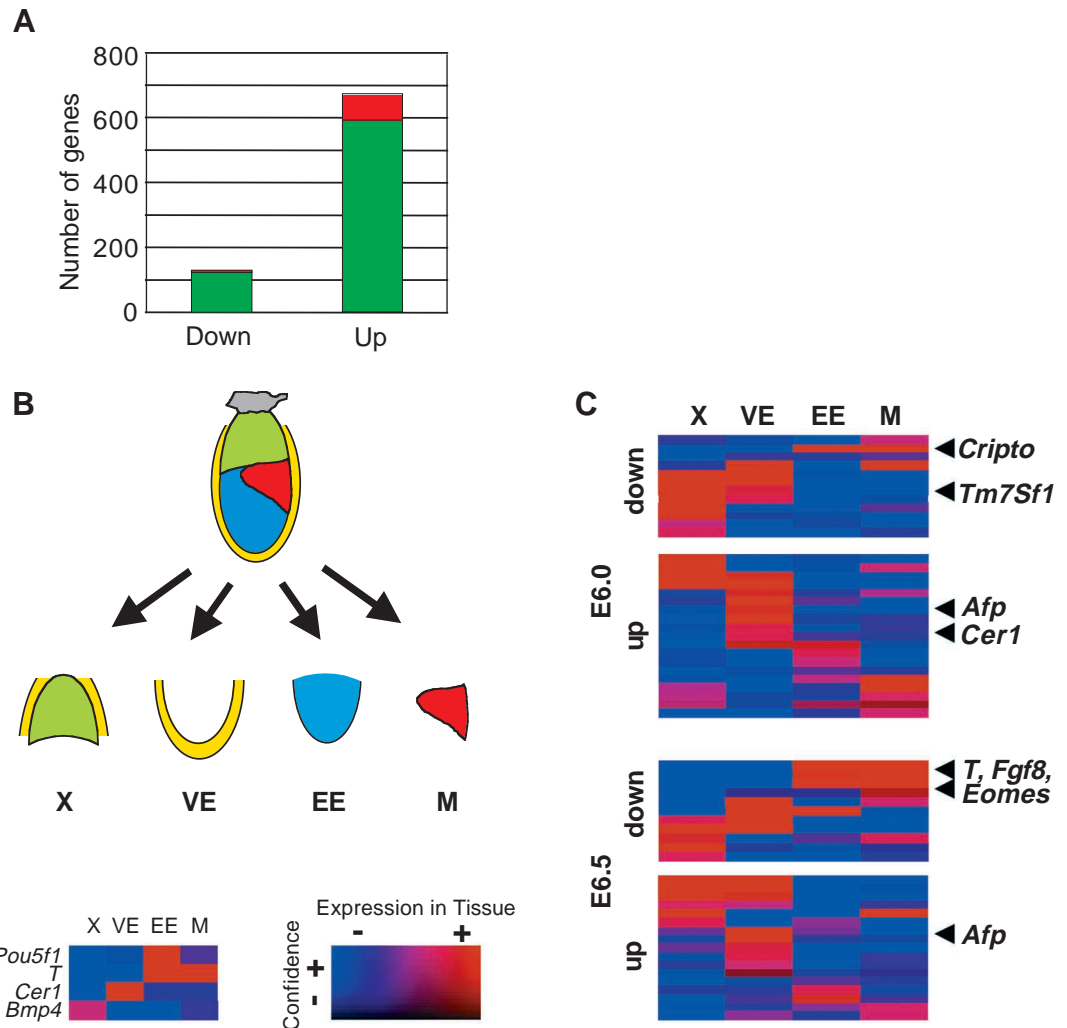

genes were upregulated in wild-type embryos at E6.5, and of these, 591 were also upregulated, and only 82 were downregulated in  $\beta$ -catenin mutants (green and red in Fig. 1A, respectively). Thus, despite the severe phenotypic defects in  $\beta$ -catenin mutant embryos, the general program of gene expression is overall highly similar to wild type at these developmental stages.

### Expression patterns of $\beta$ -catenin responsive genes

The 106 and 60 genes deregulated in  $\beta$ -catenin<sup>-/-</sup> embryos at E6.0 and E6.5 were further characterised by their expression patterns in normal development, using both in situ hybridisation and gene expression profiling of isolated tissue domains. For the latter, wild-type primitive streak stage embryos were dissected into four tissue domains, i.e. extra-embryonic tissues, visceral endoderm, embryonic ectoderm and mesoderm (Fig. 1B), and the corresponding gene expression profiles were determined. To assess the quality of the dissection, we analyzed the distribution of transcripts for

*Pou5f1*, brachyury, *Cer1* and *Bmp4*. The expression patterns of these genes have been previously determined, and their transcripts displayed the expected tissue distribution in our profiling (Fig. 1B, lower panel). We found that the majority of genes that were deregulated in  $\beta$ -catenin mutants were expressed in a restricted manner in the wild type, i.e. their transcripts were observed in one or two, but not all tissues (Fig. 1C).  $\beta$ -Catenin has previously been found to be required in the embryonic ectoderm for anteroposterior axis formation (Huelsen et al., 2000), and *Cripto*, the most strongly downregulated gene at E6.0, is indeed expressed in the embryonic ectoderm of the wild type (Fig. 1C, see also in situ hybridisation in Fig. 2A,B). *Lefty1* expression in the anterior visceral endoderm requires Nodal/*Cripto* signals (Kimura et al., 2001), and *Lefty1* expression is also absent in  $\beta$ -catenin<sup>-/-</sup> embryos (Fig. 2C-D). *Nodal* is expressed in the embryonic ectoderm in wild-type embryos (Brennan et al., 2001), and it is also expressed in the embryonic ectoderm of  $\beta$ -catenin mutants (Fig. 2E,F). *Otx2*, a homeobox gene known to function

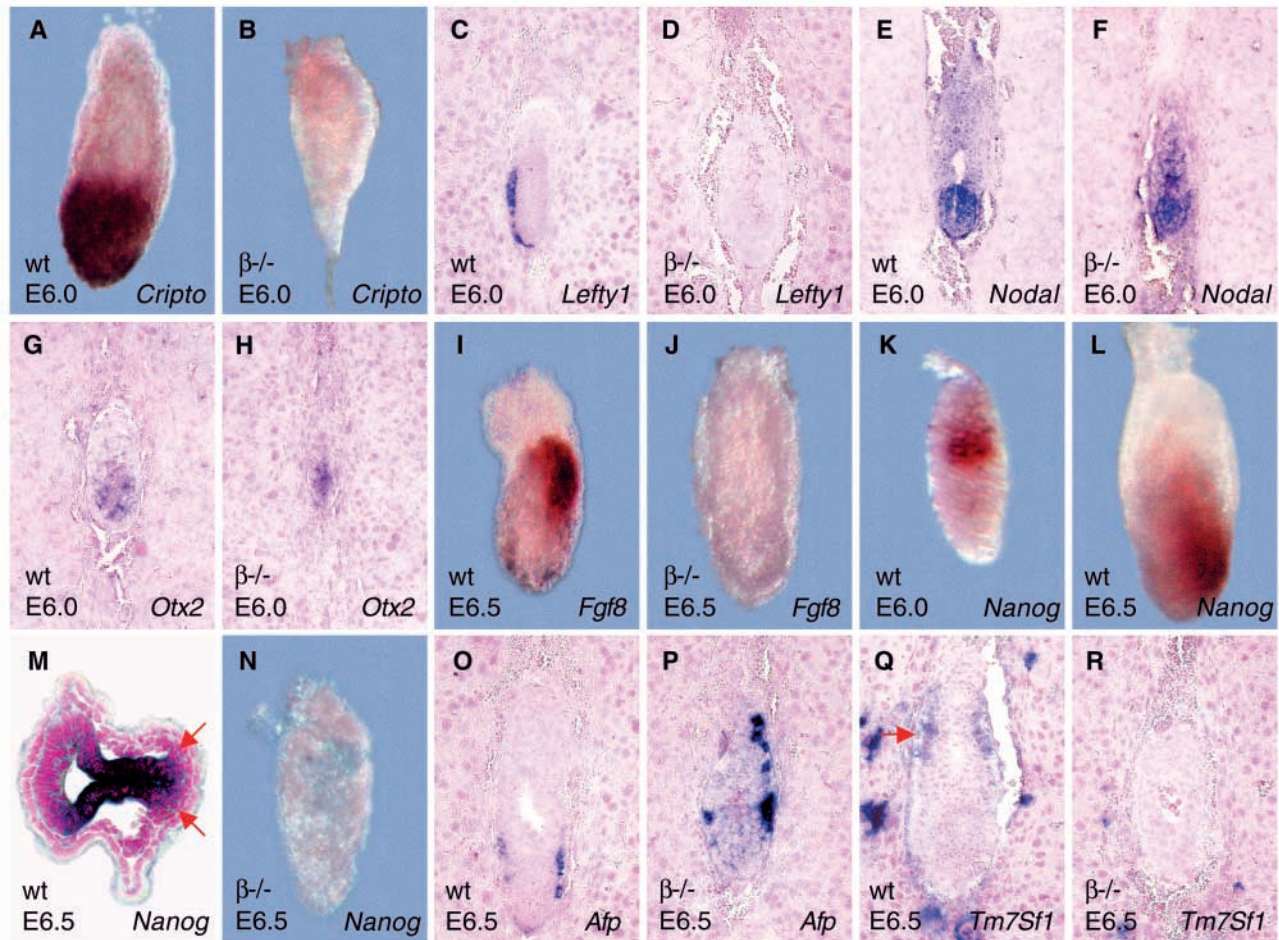

**Fig. 2.** Expression patterns of selected genes, as determined by in situ hybridisation in wild-type and  $\beta$ -catenin mutant embryos. Whole-mount in situ hybridisation (A,B,I-L,N), in situ hybridisation of sections of embryos in utero (C-H,O-R), and transverse section through primitive streak region (M) are shown. Arrows in M indicate cells that leave the primitive streak to become mesoderm. Arrow in Q indicates expression in visceral endoderm.

in the formation of the anteroposterior axis (Kimura et al., 2000; Perea-Gomez et al., 2001), is expressed appropriately in  $\beta$ -catenin mutants at E6.0, but is absent during later developmental stages (Fig. 2G,H) (Huelsen et al., 2000).

At E6.5, a large proportion of genes that are downregulated in  $\beta$ -catenin<sup>-/-</sup> embryos, are expressed in the embryonic ectoderm and the mesoderm of control embryos (Fig. 1C). It should be noted that mesodermal structures are newly generated in control embryos at E6.5, but they are absent in  $\beta$ -catenin mutants. Again, we have no information on whether these genes are regulated directly or indirectly by  $\beta$ -catenin. *Fgf8* is expressed in the posterior embryonic ectoderm and mesoderm of control embryos (Sun et al., 1999), and absent in  $\beta$ -catenin mutants (Fig. 2I,J). We find that the *Nanog* homeobox gene is expressed in the proximal embryonic ectoderm prior to streak formation, and in the distal and posterior embryonic ectoderm at E6.5 in control embryos, but is absent in  $\beta$ -catenin mutants (Fig. 2K-N). Many genes whose expression is changed in  $\beta$ -catenin mutants are expressed in the visceral endoderm and in extra-embryonic tissues (Fig. 1C), indicating that these tissues also require  $\beta$ -catenin activity for normal development. For example, the genes *Tm7Sf1* and *Afp* are expressed in subdomains of the visceral endoderm in wild

type, but are not expressed or are expressed in the entire visceral endoderm in  $\beta$ -catenin<sup>-/-</sup> embryos, respectively (Fig. 2Q-R). Again, we do not have information on whether these genes are regulated directly or indirectly by  $\beta$ -catenin, and we have not monitored possible ectopic expression of genes in the mutant. Taken together, the combination of previous analysis (Huelsen et al., 2000) and the microarray and in situ hybridisation experiments presented here, show the following major changes in  $\beta$ -catenin-deficient embryos: (1) loss of the expression of *Cripto* and of other genes in the embryonic ectoderm, (2) downregulation of genes expressed in the primitive streak and/or in the mesoderm, and (3) modified expression of genes in the visceral endoderm.

### Comparison of expression profiles of $\beta$ -catenin, *Cripto* and *Wnt3* mutant embryos

To define groups of genes regulated by signals that direct the formation of the anteroposterior axis and the mesoderm, we determined the expression profiles of *Cripto* and *Wnt3* mutant embryos at E6.0 and E6.5 and compared them with those of  $\beta$ -catenin<sup>-/-</sup> embryos. We found 30 (out of 106) genes commonly deregulated in  $\beta$ -catenin and *Cripto* mutants at E6.0 (see Table S1 at <http://dev.biologists.org/supplemental/>). The number of

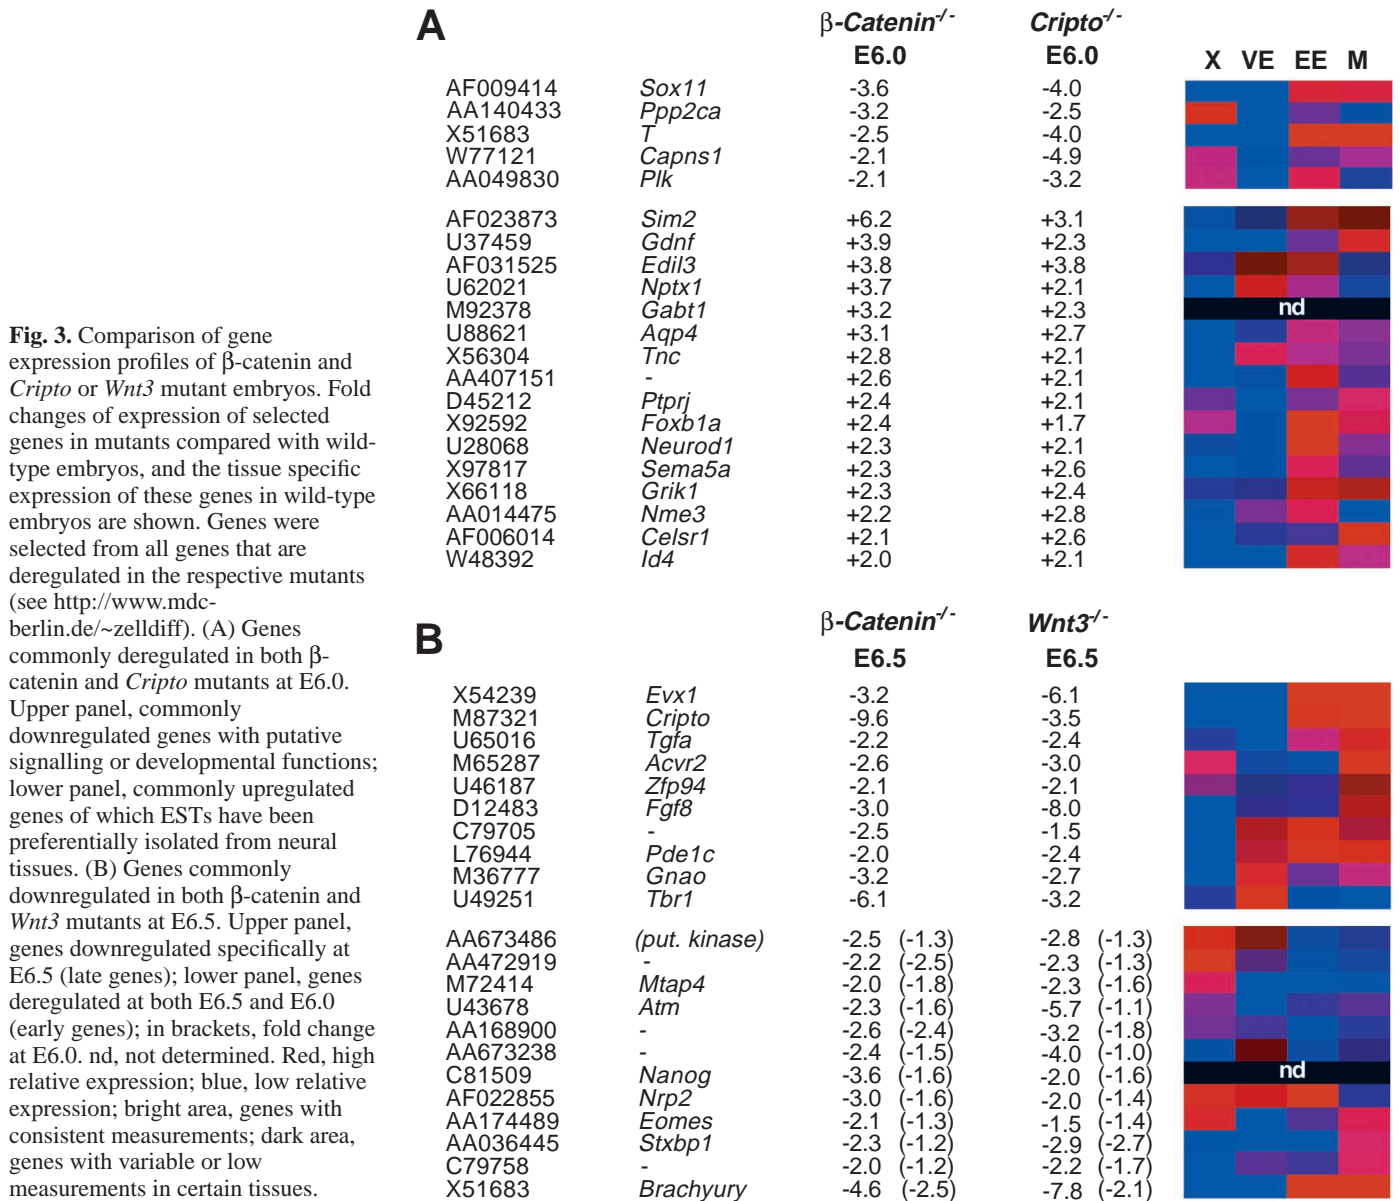

these commonly deregulated genes is high, and indeed statistical analysis showed that it is larger than expected to occur randomly ( $P < 0.01$ , as determined by the hypergeometric distribution function). We find downregulated expression of *Msx1*, *Ppp2ca*, *Ctsz* and other genes in both  $\beta$ -catenin and *Cripto* mutants, which are expressed in the embryonic ectoderm, but also in other tissue domains (Fig. 3A, upper panel). We also find upregulated expression of *Neurod1*, *Sim2* and other genes in the embryonic ectoderm, that in wild-type embryos are typically expressed in developing neural tissues (Fig. 3A, lower panel). General neural markers like *Sox1/2* are not upregulated. The commonly deregulated genes may be positioned genetically downstream of *Cripto*, and thus may not be directly controlled by  $\beta$ -catenin. These results, in conjunction with our finding that *Cripto* expression depends on  $\beta$ -catenin in the mouse embryo at E6.0, suggest that  $\beta$ -catenin regulates specific gene expression programs via *Cripto*, which is required for anteroposterior axis positioning.

When  $\beta$ -catenin and *Wnt3* mutants were compared at E6.5, we found 16 (of 60) genes commonly deregulated (see Table S1 at <http://dev.biologists.org/supplemental/>). This number is also larger than expected to occur randomly ( $P < 0.005$ , as determined by the hypergeometric distribution function). Two groups of genes can be distinguished: the first group is deregulated at E6.5, but not at E6.0 (here called late genes, upper panel in Fig. 3B), and contains genes strongly expressed in the mesoderm of control embryos, e.g. *Evx1*, *Fgf8* and *Acvr2*. The second group is downregulated at E6.5 and at E6.0 (here called early genes, lower panel in Fig. 3B), and includes genes expressed prior to primitive streak and mesoderm formation in the proximal embryonic ectoderm like brachyury and *Nanog* (Fig. 2K-N) (Wilkinson et al., 1990). We expect direct targets of  $\beta$ -catenin rather among the early than the late genes. These results are consistent with the established role for a *Wnt3*/ $\beta$ -catenin-dependent gene expression program for primitive streak and mesoderm formation (Liu et al., 1999).

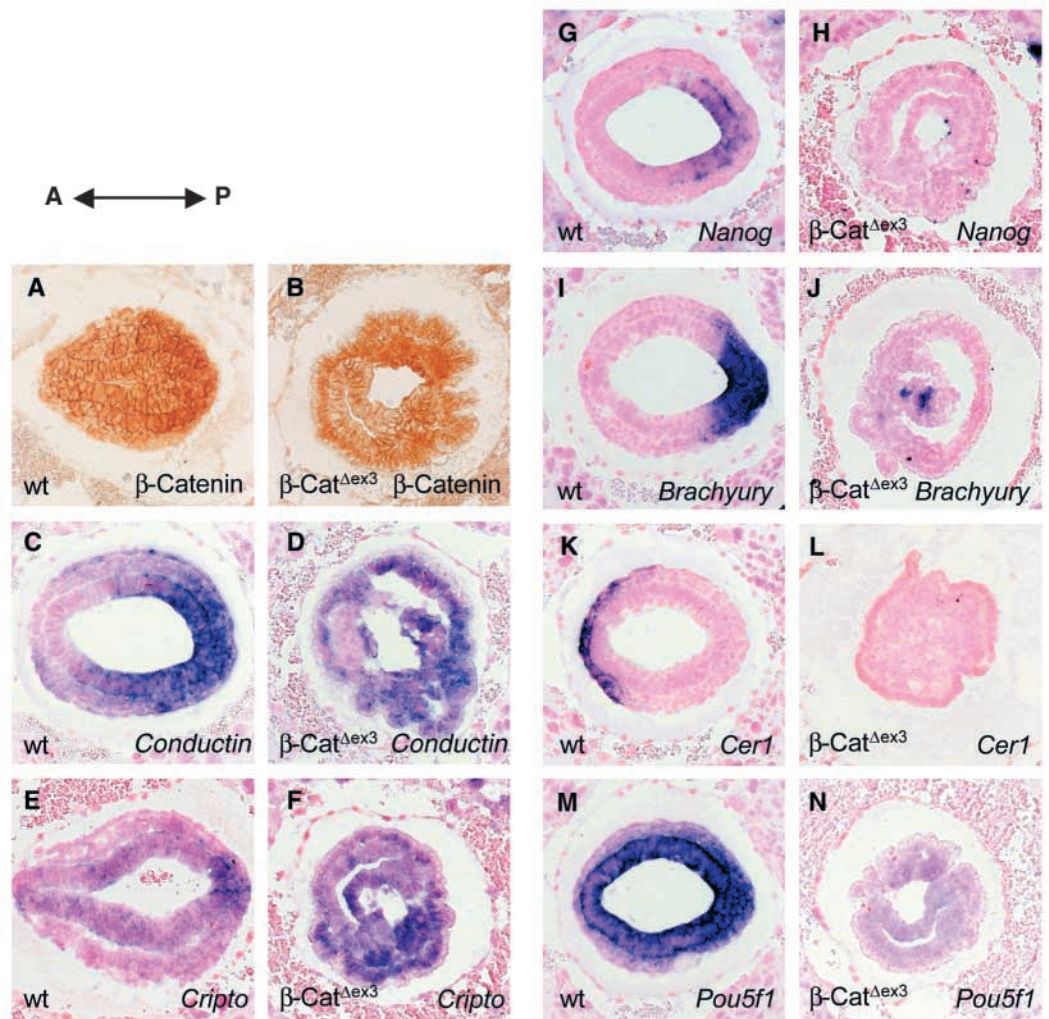

**Fig. 4.** Expression patterns of genes in wild-type embryos (left panels) and β-catenin gain-of-function mutants (right panels) that are important in embryonic patterning, as determined by immunohistochemistry (A,B) and in situ hybridisation (C-N). Transverse sections of the epiblast region at E6.5 are shown. Posterior is towards the right in wild type, as indicated above A.

**A gain-of-function mutation of β-catenin promotes Cripto expression and disturbs anteroposterior axis formation**

As loss of β-catenin led to a loss of *Cripto*, we asked whether increased β-catenin signals may promote *Cripto* expression. Constitutively active β-catenin can be produced in mice by a gain-of-function mutation in the β-catenin gene by using the *Cre-loxP* technology (Harada et al., 1999; Soshnikova et al., 2003). We introduced this conditional mutation in the early embryo by employing a mouse strain that expresses Cre recombinase early and ubiquitously under the control of the CMV promoter (Nagy et al., 1998). Using this technique, the floxed exon 3 of β-catenin is removed, which leads to constitutively active β-catenin that cannot be phosphorylated at the N terminus and cannot be degraded. We examined the expression of essential genes in embryos at E6.5 by immunohistochemistry and in situ staining of transversal sections. In wild-type embryos, β-catenin is produced asymmetrically, i.e. enriched in the cytoplasm on the posterior side, as is expression of conductin, which is a direct target of β-catenin signals (Lustig et al., 2002; Jho et al., 2002). In the gain-of-function mutants, β-catenin and conductin were highly expressed, but now symmetrically in the entire epiblast (Fig. 4A-D). Remarkably, *Cripto* expression that is also increased

on the posterior side in the wild type, was as well highly expressed symmetrically (Fig. 4E,F). These data indicate that the asymmetric expression of *Cripto* is a result of asymmetric β-catenin function, strongly suggesting that *Cripto* is a β-catenin target. Moreover, in β-catenin gain-of-function mutants, we also found loss of asymmetry of the expression of *Nanog*, *brachyury* and *Cerberus*, which mark the posterior ectoderm, posterior mesoderm and anterior visceral endoderm, respectively, and we found downregulation of the ectodermally expressed gene *Pou5f1/Oct4* (Fig. 4G-N).

**β-catenin regulates Cripto expression**

To determine whether *Cripto* is regulated by β-catenin in other tissue contexts, we first assessed its regulation in the human colon adenocarcinoma cell line Ls174T, which carries an *Apc* mutation. In these cells, β-catenin is stabilised and can be detected in the cytoplasm and the nucleus, and *Lef/Tcf/β-catenin* responsive promoters are active (van de Wetering et al., 2002). We found that *Cripto* is strongly expressed in these cells, while induction of dominant-negative Tcf4 abolishes *Cripto* expression (Fig. 5A), and blocks the expression of other β-catenin responsive genes (van de Wetering et al., 2002). We next examined expression of *Cripto* in intestinal adenomas of *Min* mice, which carry an *Apc* mutation, exhibit increased β-

**Fig. 5.** *Cripto* is regulated by  $\beta$ -catenin/Tcf in colon cancer cells and tumours.

(A) Northern blot analysis of *Cripto* expression in Ls174T colon adenocarcinoma cells. Expression of *Cripto* in control Ls174T cells and in cells that express dominant-negative Tcf4 in a tetracycline-inducible manner is shown. *Cripto* expression was assessed before (–) and 12 hours after (+) induction with doxycyclin. RNA-loading control, 28s rRNA. (B) In situ hybridisation on consecutive sections of intestinal epithelium of *Min* (APC mutant) mice that contain an adenoma. The  $\beta$ -catenin target gene *conductin* marks the crypts and the adenoma. *Cripto* and *Tssc3* (see Table 1) are also upregulated in the adenoma.

(C) Identity plot of murine and human genomic sequences in the region of the *Cripto* locus. The mouse sequence is indicated on the horizontal axis. The transcribed region of *Cripto* is indicated by a horizontal arrow, the position of *Cripto* exons by black boxes. The *Cripto* enhancer (8 kb upstream) and immediate 5' flanking regions are indicated by red and green boxes, respectively. Conserved sequence stretches between mouse and human sequences are indicated by the short horizontal lines (50% to 100% identity). Consensus sequences for Lef/Tcf binding sites (WWCAAAG) in the murine genome are indicated by vertical red lines. Sequences were aligned using the Pimap program (Schwartz et al., 2000).

(D,E) Identification of  $\beta$ -catenin/Tcf responsive elements in the *Cripto* enhancer by luciferase reporter gene assay, using a Tcf4- $\beta$ -catenin hybrid effector plasmid.  $\beta$ -Catenin-responsive TOPflash and inactive FOPflash have been described previously (Molenaar et al., 1996). Mutations in the three Lef/Tcf-binding sites (3xMUT) are described in the Materials and methods.

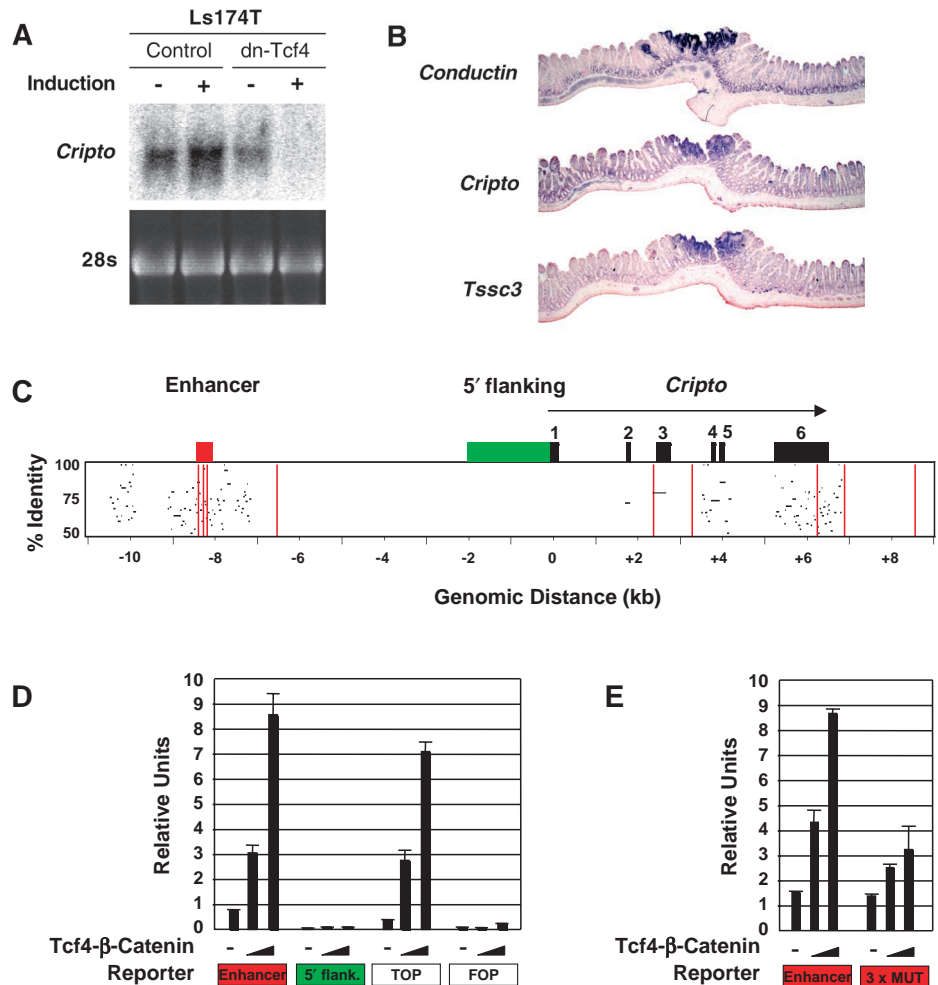

catenin signalling and develop multiple intestinal adenomas (Moser et al., 1992; Smits et al., 1999). *Cripto* expression was indeed upregulated in the adenomas of *Min* mice (Fig. 5B), as was the expression of the known Wnt target gene *conductin* (Lustig et al., 2002; Jho et al., 2002). We also analyzed the expression of other  $\beta$ -catenin responsive genes identified in the embryo, and found *Tssc3* to be upregulated in adenomas of *Min* mice (Fig. 5B, see also Table 1).

We identified three closely linked Lef/Tcf consensus binding sites in the mouse genome 8 kb upstream of the *Cripto* transcription start site; this region, including one of the Lef/Tcf consensus sites, is highly conserved between mouse and human genomes (Fig. 5C). A 0.4 kb mouse genomic fragment containing the putative Lef/Tcf-binding sites conferred responsiveness to Tcf4 when inserted into a reporter gene construct (Fig. 5D), comparable with the artificial Wnt reporter TOPflash (Molenaar et al., 1996). Mutation of the Lef/Tcf site consensus sequences strongly reduced responsiveness of the reporter to Tcf4 (Fig. 5E). By contrast, the immediate 5' flanking region of the *Cripto* gene (green in Fig. 5C) did not activate gene expression in a Tcf4-dependent manner (Fig. 5D). These results suggest that expression of

*Cripto* may be modulated directly by Lef/Tcf/ $\beta$ -catenin complexes.

## Discussion

$\beta$ -Catenin mutant embryos fail to undergo two crucial developmental steps: (1) the distal visceral endoderm does not become positioned at the anterior side at E6.0, and (2) primitive streak and mesoderm formation does not occur at E6.5 (see scheme in Fig. 6A) (Huelsen et al., 2000). These changes can be interpreted as the sum of the phenotypes observed in *Cripto* and *Wnt3* mutant mice. *Cripto*<sup>-/-</sup> embryos fail to re-orient the anteroposterior axis at E6.0, but generate extra-embryonic mesoderm from the proximal epiblast at E6.5, whereas *Wnt3*<sup>-/-</sup> embryos correctly position the anteroposterior axis at E6.0, but fail to generate mesoderm at E6.5 (Fig. 6A) (Ding et al., 1998; Liu et al., 1999). Using expression profiling, we have identified *Cripto* and other genes whose expression is absent in  $\beta$ -catenin mutants at E6.0, when the anteroposterior axis is normally re-oriented in wild-type embryos. We also identified *brachyury*, *Nanog* and other genes whose expression depends on  $\beta$ -catenin at E6.5, when the primitive streak and mesoderm are formed.



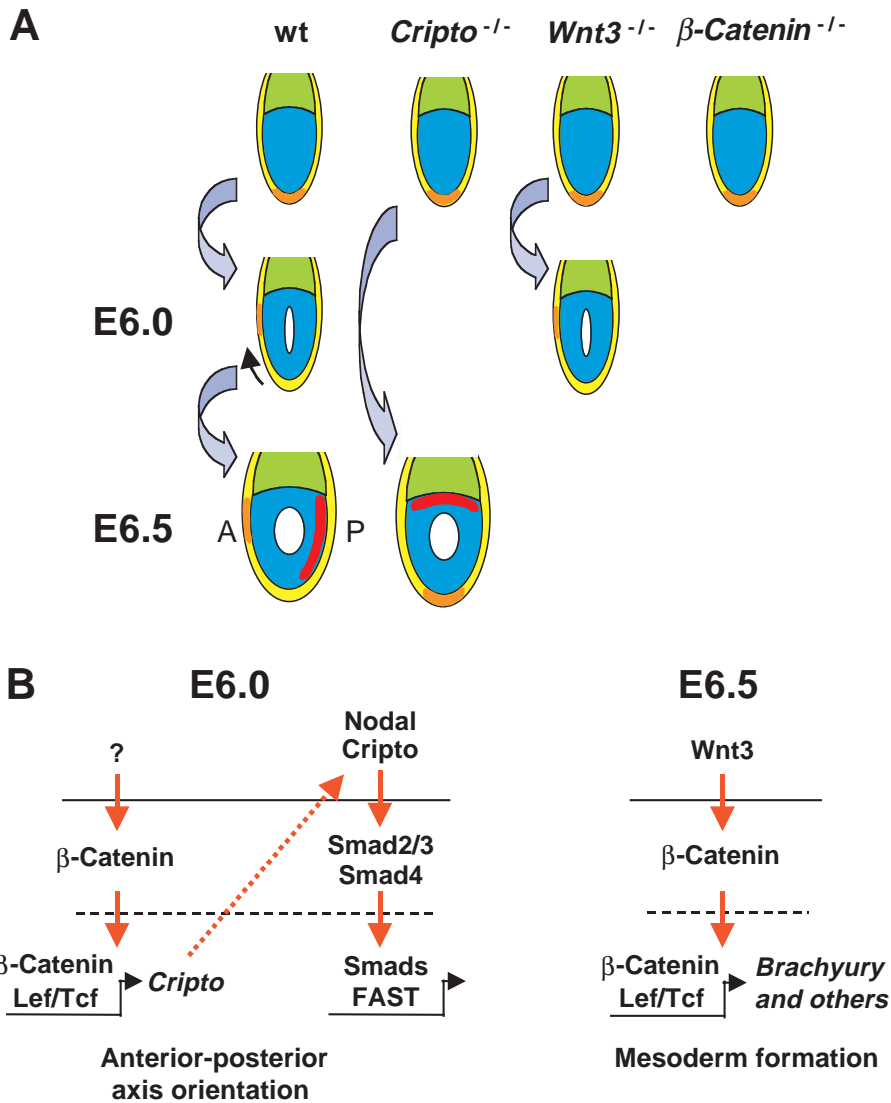

**Fig. 6.** Schematic representation of developmental steps in mouse embryos that depend on  $\beta$ -catenin. (A) Scheme of wild-type, *Cripto*, *Wnt3* and  $\beta$ -catenin mutant phenotypes. Blue, embryonic ectoderm; green, extra-embryonic ectoderm; yellow, visceral endoderm; orange, signalling centre in visceral endoderm; red, primitive streak; A, anterior; P, posterior. (B) Schematic representation of putative signalling events. At E6.0,  $\beta$ -catenin regulates expression of *Cripto*, which is required for anteroposterior axis positioning. Components upstream of  $\beta$ -catenin are unknown in this pathway. At E6.5, *Wnt3* controls  $\beta$ -catenin, which directly or indirectly regulates the expression of downstream genes (such as *brachyury*, *Nanog* and others) and leads to primitive streak and mesoderm formation. Red arrows indicate the order of signal transduction events, the broken arrow indicates crosstalk between the  $\beta$ -catenin and Nodal signalling pathways via *Cripto*. Continuous and broken horizontal lines separate the extracellular, cytoplasmic and nuclear compartments.

Furthermore, we find a significant overlap of genes whose expression is deregulated in  $\beta$ -catenin and *Cripto*, and in  $\beta$ -catenin and *Wnt3* mutant embryos at E6.0 and E6.5, respectively. Our profiling data thus support our model of two distinct  $\beta$ -catenin dependent steps (Fig. 6B). In the first step,  $\beta$ -catenin is essential for the expression of the Nodal co-receptor gene *Cripto* in the epiblast, which is required for translocation of the distal visceral endoderm to the anterior side, and thus the correct orientation of the anteroposterior axis at E6.0. In the second step,  $\beta$ -catenin is required for *Wnt3* signalling and thus regulates the expression of target genes in the proximal/posterior epiblast that are essential for mesoderm formation.

Although the transcriptional activity of  $\beta$ -catenin is generally thought to be Wnt dependent, the Wnt ligand that regulates  $\beta$ -catenin activity during formation of the anteroposterior axis is unknown (Fig. 6B). Notably, mutant mice in which canonical Wnt signal transduction is completely blocked upstream of  $\beta$ -catenin by mutation of a chaperone of the Wnt co-receptors LRP5/6 display defective mesoderm formation, but form a normal anteroposterior axis (Hsieh et al., 2003). These studies suggest the existence of a Wnt-

independent requirement for  $\beta$ -catenin during mouse anteroposterior axis positioning. Perhaps consistent with this idea, the development of the dorsoanterior axis in *Xenopus* is dependent on  $\beta$ -catenin and additional components of the Wnt signal transduction machinery such as GBP/Gsk3- $\beta$ /Axin, but cannot be inhibited by dominant-negative Wnt molecules (Yost et al., 1998; De Robertis et al., 2000).

We have demonstrated an unexpected mechanism underlying the genetic interaction between  $\beta$ -catenin and Nodal/Cripto signalling during early mouse embryogenesis. Previous studies in *Xenopus* have demonstrated an interaction between the  $\beta$ -catenin and Nodal pathways through the coordinate transcriptional regulation of downstream targets such as *Twin*, a homeobox gene, which is essential for the formation of the Spemann organiser (Nishita et al., 2000; Labbe et al., 2000). We show that  $\beta$ -catenin signalling in the mouse embryo impinges upon the Nodal pathway through regulation of the Nodal co-receptor *Cripto*. *Cripto* expression is absent in  $\beta$ -catenin-deficient embryos, while it is enforced in  $\beta$ -catenin gain-of-function mutants. *Nodal*<sup>-/-</sup> mice do not express *Cripto* (Brennan et al., 2001), and thus the regulation of *Cripto* is not solely dependent on  $\beta$ -catenin, but requires Nodal activity as well. We find that *Nodal* is expressed appropriately in  $\beta$ -catenin mutants, indicating that loss of *Cripto* is not due to the absence of Nodal.

We have identified genes that are commonly downregulated in both *Cripto*- and  $\beta$ -catenin-deficient embryos at E6.0, e.g. *Sox11*, *Ppp2ca* and *Plk*. These latter genes are expressed in the embryonic ectoderm and may be targets of *Cripto*. Alternatively, *Cripto* may signal to associated tissue domains, e.g. the visceral endoderm and the extra-embryonic ectoderm

during this developmental stage. It is known that developmental signalling pathways interact across tissue borders (Struhl and Basler, 1993; Brennan et al., 2001). We have also identified genes that are commonly upregulated in both *Cripto* and  $\beta$ -catenin-deficient embryos at E6.0, e.g. *Sim2*, *Neurod1* and *Aqp4*. Interestingly, these genes are often expressed in neural tissues (Kimura et al., 2001). We also found loss of expression of the ectodermally expressed gene *Pou5f1/Oct4* in  $\beta$ -catenin gain-of-function mutants. Consistent with these findings, recent studies indicate that  $\beta$ -catenin-mediated signals can block ectodermal differentiation of embryonic stem cells, whereas the suppression of such signals induces neuroectodermal differentiation (Kielman et al., 2002; Aubert et al., 2002). Moreover, precocious expression of the neurally expressed genes *Hesx* and *Six3* has previously been noted in *Cripto* mutants (Ding et al., 1998). The increased expression of neurally expressed genes in  $\beta$ -catenin and *Cripto* mutants may be indicative of premature neuroectodermal differentiation, and may imply that these genes act downstream of *Cripto*.

The comparison of genes deregulated in  $\beta$ -catenin and *Wnt3* mutants at E6.5 and E6.0 allowed us to dissect the sequence of events that leads to primitive streak and mesoderm formation. In control embryos, genes like brachyury (Wilkinson et al., 1990), *Nanog* and *Eomes* (Russ et al., 2000) are expressed early in the embryonic ectoderm before the primitive streak and mesoderm are formed, and these genes are deregulated at both E6.0 and E6.5 in  $\beta$ -catenin and *Wnt3* mutants (early genes). Subsequently, genes like *Fgf8* (Sun et al., 1999) and *Evx1* (Dush and Martin, 1992) are expressed in the developing mesoderm of control embryos, and these are deregulated at E6.5, but not at E6.0 in  $\beta$ -catenin and *Wnt3* mutants, owing to absence of mesoderm (late genes). Among the set of early genes, we have identified the homeobox gene *Nanog*, which is required for maintenance of pluripotency of epiblast cells prior to implantation (Chambers et al., 2003; Mitsui et al., 2003). At E6.0, *Nanog* is expressed in the proximal epiblast, and this expression domain shifts to more distal and posterior positions in the E6.5 embryo. *Nanog* expression is thus similar to the expression pattern of *Wnt3* (Liu et al., 1999), suggesting that *Nanog* may be regulated by *Wnt3*/ $\beta$ -catenin signals during gastrulation. Our analysis therefore indicates that *Nanog* may have additional functions in the post-implantation mouse embryo.

Gene expression profiling revealed that the vast majority of genes that change expression between E6.0 and E6.5 in wild-type embryos are regulated in a similar manner in  $\beta$ -catenin mutants, i.e. they are either commonly up- or commonly downregulated. This finding suggests that the loss of  $\beta$ -catenin affects specific, and not general developmental programs. Moreover, most genes that are deregulated in  $\beta$ -catenin mutant embryos are expressed in specific domains of the wild-type embryo, suggesting tissue-specific functions. Surprisingly, a large group of  $\beta$ -catenin modulated genes are expressed in extra-embryonic tissues of control embryos, and only a fraction of these are also deregulated in *Cripto* mutants. It is thus possible that additional  $\beta$ -catenin-dependent developmental programs regulate gene expression in visceral endoderm and extra-embryonic ectoderm. In accordance with this, a loss of regionalisation of the visceral endoderm in  $\beta$ -catenin mutants was previously observed by electron

microscopy (Huelsenken et al., 2000). A recent study using conditional inactivation of  $\beta$ -catenin has indicated a requirement of  $\beta$ -catenin in the visceral endoderm (Lickert et al., 2002). Together with our previous results, i.e. that  $\beta$ -catenin function is required in the embryonic ectoderm (Huelsenken et al., 2000), these data may indicate that  $\beta$ -catenin has multiple essential roles in early embryogenesis.

We also observed regulation of *Cripto* expression by  $\beta$ -catenin during tumorigenesis. *Cripto* expression is regulated by *Lef/Tcf* in colon cancer cells, and by  $\beta$ -catenin in colon adenomas of Min mice. *Cripto* was previously found to be overexpressed in a wide range of epithelial tumours, including colon, gastric and endometrial carcinomas, which also frequently harbour activating mutations in the *Wnt*/ $\beta$ -catenin signalling pathway (Salomon et al., 2000). Tissue culture studies have implicated *Cripto* in cell survival, proliferation control, and oncogenic transformation (Ciardiello et al., 1991; Niemeyer et al., 1998), indicating that *Cripto* expression contributes to malignancy. Our work suggests that activation of  $\beta$ -catenin signalling in tumours may be responsible for *Cripto* overexpression. *Cripto* may thus be a direct and critical target gene of *Lef/Tcf* transcription factors in tumorigenesis and could potentially represent a suitable extracellular target for future tumour therapy.

We thank Carmen Birchmeier for helpful discussions and valuable comments on the manuscript, Frauke Kosel for excellent technical assistance and Marta Rosario for critical reading of the manuscript. This research was supported by awards from the American Heart Association (J.D.) and the Leukemia and Lymphoma Society (J.D.), NIH grants HD42837 and HD38766 (M.M.S.), and Helmholtz Society Strategic Fund Initiative 'DNA Chips' (M.M. and W.B.).

## References

- Arnold, S. J., Stappert, J., Bauer, A., Kispert, A., Herrmann, B. G. and Kemler, R. (2000). Brachyury is a target gene of the *Wnt*/ $\beta$ -catenin signaling pathway. *Mech. Dev.* **91**, 249-258.
- Aubert, J., Dunstan, H., Chambers, I. and Smith, A. (2002). Functional gene screening in embryonic stem cells implicates *Wnt* antagonism in neural differentiation. *Nat. Biotechnol.* **20**, 1240-1245.
- Beddington, R. S. and Robertson, E. J. (1999). Axis development and early asymmetry in mammals. *Cell* **96**, 195-209.
- Behrens, J., von Kries, J. P., Kuhl, M., Bruhn, L., Wedlich, D., Grosschedl, R. and Birchmeier, W. (1996). Functional interaction of  $\beta$ -catenin with the transcription factor LEF-1. *Nature* **382**, 638-642.
- Belo, J. A., Bouwmeester, T., Leyns, L., Kertesz, N., Gallo, M., Follettie, M. and de Robertis, E. M. (1997). Cerberus-like is a secreted factor with neutralizing activity expressed in the anterior primitive endoderm of the mouse gastrula. *Mech. Dev.* **68**, 45-57.
- Brennan, J., Lu, C. C., Norris, D. P., Rodriguez, T. A., Beddington, R. S. and Robertson, E. J. (2001). Nodal signalling in the epiblast patterns the early mouse embryo. *Nature* **411**, 965-969.
- Capdevila, J. and Izpisua Belmonte, J. C. (2001). Patterning mechanisms controlling vertebrate limb development. *Annu. Rev. Cell Dev. Biol.* **17**, 87-132.
- Chambers, I., Colby, D., Robertson, M., Nichols, J., Lee, S., Tweedie, S. and Smith, A. (2003). Functional expression cloning of *nanog*, a pluripotency sustaining factor in embryonic stem cells. *Cell* **113**, 643-655.
- Chen, X., Rubock, M. J. and Whitman, M. (1996). A transcriptional partner for *MAD* proteins in TGF- $\beta$  signalling. *Nature* **383**, 691-696.
- Ciardiello, F., Dono, R., Kim, N., Persico, M. G. and Salomon, D. S. (1991). Expression of *cripto*, a novel gene of the epidermal growth factor gene family, leads to in vitro transformation of a normal mouse mammary epithelial cell line. *Cancer Res.* **51**, 1051-1054.
- Conlon, F. L., Lyons, K. M., Takaesu, N., Barth, K. S., Kispert, A., Herrmann, B. and Robertson, E. J. (1994). A primary requirement for

- nodal in the formation and maintenance of the primitive streak in the mouse. *Development* **120**, 1919-1928.
- Dahmen, R. P., Koch, A., Denkhaus, D., Tonn, J. C., Sorensen, N., Berthold, F., Behrens, J., Birchmeier, W., Wiestler, O. D. and Pietsch, T.** (2001). Deletions of AXIN1, a component of the WNT/wingless pathway, in sporadic medulloblastomas. *Cancer Res.* **61**, 7039-7043.
- De Robertis, E. M., Larrain, J., Oelgeschlager, M. and Wessely, O.** (2000). The establishment of Spemann's organizer and patterning of the vertebrate embryo. *Nat. Rev. Genet.* **1**, 171-181.
- Ding, J., Yang, L., Yan, Y. T., Chen, A., Desai, N., Wynshaw-Boris, A. and Shen, M. M.** (1998). Cripto is required for correct orientation of the anterior-posterior axis in the mouse embryo. *Nature* **395**, 702-707.
- Dush, M. K. and Martin, G. R.** (1992). Analysis of mouse *Evx* genes: *Evx-1* displays graded expression in the primitive streak. *Dev. Biol.* **151**, 273-287.
- Eppert, K., Scherer, S. W., Ozelik, H., Pirone, R., Hoodless, P., Kim, H., Tsui, L. C., Bapat, B., Gallinger, S., Andrusis, I. L. et al.** (1996). MADR2 maps to 18q21 and encodes a TGF $\beta$ -regulated MAD-related protein that is functionally mutated in colorectal carcinoma. *Cell* **86**, 543-552.
- Feldman, B., Gates, M. A., Egan, E. S., Dougan, S. T., Rennebeck, G., Sirotkin, H. I., Schier, A. F. and Talbot, W. S.** (1998). Zebrafish organizer development and germ-layer formation require nodal-related signals. *Nature* **395**, 181-185.
- Feller, W.** (1968). *An Introduction to Probability Theory and Its Applications*, Vol. I. New York: John Wiley & Sons.
- Galceran, J., Hsu, S. C. and Grosschedl, R.** (2001). Rescue of a Wnt mutation by an activated form of LEF-1: Regulation of maintenance but not initiation of Brachyury expression. *Proc. Natl. Acad. Sci. USA* **98**, 8668-8673.
- Gritsman, K., Zhang, J., Cheng, S., Heckscher, E., Talbot, W. S. and Schier, A. F.** (1999). The EGF-CFC protein one-eyed pinhead is essential for nodal signaling. *Cell* **97**, 121-132.
- Groden, J., Thliveris, A., Samowitz, W., Carlson, M., Gelbert, L., Albertsen, H., Joslyn, G., Stevens, J., Spirio, L., Robertson, M. et al.** (1991). Identification and characterization of the familial adenomatous polyposis coli gene. *Cell* **66**, 589-600.
- Harada, N., Tamai, Y., Ishikawa, T., Sauer, B., Takaku, K., Oshima, M. and Taketo, M. M.** (1999). Intestinal polyposis in mice with a dominant stable mutation of the beta-catenin gene. *EMBO J.* **18**, 5931-5942.
- Harrison, S. M., Dunwoodie, S. L., Arkell, R. M., Lehrach, H. and Beddington, R. S.** (1995). Isolation of novel tissue-specific genes from cDNA libraries representing the individual tissue constituents of the gastrulating mouse embryo. *Development* **121**, 2479-2489.
- He, T. C., Sparks, A. B., Rago, C., Hermeking, H., Zawel, L., da Costa, L. T., Morin, P. J., Vogelstein, B. and Kinzler, K. W.** (1998). Identification of c-MYC as a target of the APC pathway. *Science* **281**, 1509-1512.
- Heasman, J., Crawford, A., Goldstone, K., Garner-Hamrick, P., Gumbiner, B., McCrean, P., Kintner, C., Noro, C. Y. and Wylie, C.** (1994). Overexpression of cadherins and underexpression of beta-catenin inhibit dorsal mesoderm induction in early *Xenopus* embryos. *Cell* **79**, 791-803.
- Heisenberg, C. P., Houart, C., Take-Uchi, M., Rauch, G. J., Young, N., Coutinho, P., Masai, I., Caneparo, L., Concha, M. L., Geisler, R. et al.** (2001). A mutation in the Gsk3-binding domain of zebrafish Masterblind/Axin1 leads to a fate transformation of telencephalon and eyes to diencephalon. *Genes Dev.* **15**, 1427-1434.
- Hsieh, J. C., Lee, L., Zhang, L., Wefer, S., Brown, K., DeRossi, C., Wines, M. E., Rosenquist, T. and Holdener, B. C.** (2003). Mesd encodes an LRP5/6 chaperone essential for specification of mouse embryonic polarity. *Cell* **112**, 355-367.
- Huelsken, J., Vogel, R., Brinkmann, V., Erdmann, B., Birchmeier, C. and Birchmeier, W.** (2000). Requirement for beta-catenin in anterior-posterior axis formation in mice. *J. Cell Biol.* **148**, 567-578.
- Jessell, T. M.** (2000). Neuronal specification in the spinal cord: inductive signals and transcriptional codes. *Nat. Rev. Genet.* **1**, 20-29.
- Jho, E. H., Zhang, T., Doman, C., Joo, C. K., Freund, J. N. and Costantini, F.** (2002). Wnt/beta-catenin/Tcf signaling induces the transcription of Axin2, a negative regulator of the signaling pathway. *Mol. Cell. Biol.* **22**, 1172-1183.
- Kelly, C., Chin, A. J., Leatherman, J. L., Kozlowski, D. J. and Weinberg, E. S.** (2000). Maternally controlled (beta)-catenin-mediated signaling is required for organizer formation in the zebrafish. *Development* **127**, 3899-3911.
- Kielman, M. F., Rindapaa, M., Gaspar, C., van Poppel, N., Breukel, C., van Leeuwen, S., Taketo, M. M., Roberts, S., Smits, R. and Fodde, R.** (2002). *Apc* modulates embryonic stem-cell differentiation by controlling the dosage of beta-catenin signaling. *Nat. Genet.* **32**, 594-605.
- Kimelman, D. and Griffin, K. J.** (2000). Vertebrate mesendoderm induction and patterning. *Curr. Opin. Genet. Dev.* **10**, 350-356.
- Kimura, C., Yoshinaga, K., Tian, E., Suzuki, M., Aizawa, S. and Matsuo, I.** (2000). Visceral endoderm mediates forebrain development by suppressing posteriorizing signals. *Dev. Biol.* **225**, 304-321.
- Kimura, C., Shen, M. M., Takeda, N., Aizawa, S. and Matsuo, I.** (2001). Complementary functions of *Otx2* and *Cripto* in initial patterning of mouse epiblast. *Dev. Biol.* **235**, 12-32.
- Kinzler, K. W., Nilbert, M. C., Su, L. K., Vogelstein, B., Bryan, T. M., Levy, D. B., Smith, K. J., Preisinger, A. C., Hedge, P., McKechnie, D. et al.** (1991). Identification of FAP locus genes from chromosome 5q21. *Science* **253**, 661-665.
- Kumar, A., Novoselov, V., Celeste, A. J., Wolfman, N. M., ten Dijke, P. and Kuehn, M. R.** (2001). Nodal signaling uses activin and transforming growth factor-beta receptor-regulated Smads. *J. Biol. Chem.* **276**, 656-661.
- Labbe, E., Letamendia, A. and Attisano, L.** (2000). Association of Smads with lymphoid enhancer binding factor 1/T cell-specific factor mediates cooperative signaling by the transforming growth factor-beta and wnt pathways. *Proc. Natl. Acad. Sci. USA* **97**, 8358-8363.
- Lawson, K. A., Dunn, N. R., Roelen, B. A., Zeinstra, L. M., Davis, A. M., Wright, C. V., Korving, J. P. and Hogan, B. L.** (1999). *Bmp4* is required for the generation of primordial germ cells in the mouse embryo. *Genes Dev.* **13**, 424-436.
- Lee, M. H., Reynisdottir, I. and Massague, J.** (1995). Cloning of p57KIP2, a cyclin-dependent kinase inhibitor with unique domain structure and tissue distribution. *Genes Dev.* **9**, 639-649.
- Lickert, H., Kutsch, S., Kanzler, B., Tamai, Y., Taketo, M. M. and Kemler, R.** (2002). Formation of multiple hearts in mice following deletion of beta-catenin in the embryonic endoderm. *Dev. Cell* **3**, 171-181.
- Liu, F., Hata, A., Baker, J. C., Doody, J., Carcamo, J., Harland, R. M. and Massague, J.** (1996). A human Mad protein acting as a BMP-regulated transcriptional activator. *Nature* **381**, 620-623.
- Liu, P., Wakamiya, M., Shea, M. J., Albrecht, U., Behringer, R. R. and Bradley, A.** (1999). Requirement for *Wnt3* in vertebrate axis formation. *Nat. Genet.* **22**, 361-365.
- Liu, W., Dong, X., Mai, M., Seelan, R. S., Taniguchi, K., Krishnadath, K. K., Halling, K. C., Cunningham, J. M., Boardman, L. A., Qian, C. et al.** (2000). Mutations in AXIN2 cause colorectal cancer with defective mismatch repair by activating beta-catenin/TCF signalling. *Nat. Genet.* **26**, 146-147.
- Luo, L., Salunga, R. C., Guo, H., Bittner, A., Joy, K. C., Galindo, J. E., Xiao, H., Rogers, K. E., Wan, J. S., Jackson, M. R. and Erlander, M. G.** (1999). Gene expression profiles of laser-captured adjacent neuronal subtypes. *Nat. Med.* **5**, 117-122.
- Lustig, B., Jerchow, B., Sachs, M., Weiler, S., Pietsch, T., Karsten, U., van de, W. M., Clevers, H., Schlag, P. M., Birchmeier, W. and Behrens, J.** (2002). Negative feedback loop of Wnt signaling through upregulation of conductin/axin2 in colorectal and liver tumors. *Mol. Cell. Biol.* **22**, 1184-1193.
- Markowitz, S., Wang, J., Myeroff, L., Parsons, R., Sun, L., Lutterbaugh, J., Fan, R. S., Zborowska, E., Kinzler, K. W., Vogelstein, B. et al.** (1995). Inactivation of the type II TGF-beta receptor in colon cancer cells with microsatellite instability. *Science* **268**, 1336-1338.
- Mitsui, K., Tokuzawa, Y., Itoh, H., Segawa, K., Murakami, M., Takahashi, K., Maruyama, M., Maeda, M. and Yamanaka, S.** (2003). The Homeoprotein Nanog Is Required for Maintenance of Pluripotency in Mouse Epiblast and ES Cells. *Cell* **113**, 631-642.
- Molenaar, M., van de Wetering, M., Oosterwegel, M., Peterson-Maduro, J., Godsave, S., Korinek, V., Roose, J., Destree, O. and Clevers, H.** (1996). XTcf-3 transcription factor mediates beta-catenin-induced axis formation in *Xenopus* embryos. *Cell* **86**, 391-399.
- Morin, P. J., Sparks, A. B., Korinek, V., Barker, N., Clevers, H., Vogelstein, B. and Kinzler, K. W.** (1997). Activation of beta-catenin-Tcf signaling in colon cancer by mutations in beta-catenin or APC. *Science* **275**, 1787-1790.
- Moser, A. R., Dove, W. F., Roth, K. A. and Gordon, J. I.** (1992). The Min (multiple intestinal neoplasia) mutation: its effect on gut epithelial cell differentiation and interaction with a modifier system. *J. Cell Biol.* **116**, 1517-1526.
- Nagy, A., Moens, C., Ivanyi, E., Pawling, J., Gertsenstein, M., Hadjantonakis, A. K., Pirity, M. and Rossant, J.** (1998). Dissecting the role of N-myc in development using a single targeting vector to generate a series of alleles. *Curr. Biol.* **8**, 661-664.

- Nasevicius, A., Hyatt, T., Kim, H., Guttman, J., Walsh, E., Sumanas, S., Wang, Y. and Ekker, S. C. (1998). Evidence for a frizzled-mediated wnt pathway required for zebrafish dorsal mesoderm formation. *Development* **125**, 4283-4292.
- Niemeyer, C. C., Persico, M. G. and Adamson, E. D. (1998). Cripto: roles in mammary cell growth, survival, differentiation and transformation. *Cell Death Differ.* **5**, 440-449.
- Nishita, M., Hashimoto, M. K., Ogata, S., Laurent, M. N., Ueno, N., Shibuya, H. and Cho, K. W. (2000). Interaction between Wnt and TGF-beta signalling pathways during formation of Spemann's organizer. *Nature* **403**, 781-785.
- Perea-Gomez, A., Lawson, K. A., Rhinn, M., Zakin, L., Brulet, P., Mazan, S. and Ang, S. L. (2001). Otx2 is required for visceral endoderm movement and for the restriction of posterior signals in the epiblast of the mouse embryo. *Development* **128**, 753-765.
- Polakis, P. (2000). Wnt signaling and cancer. *Genes Dev.* **14**, 1837-1851.
- Rosner, M. H., Vigano, M. A., Ozato, K., Timmons, P. M., Poirier, F., Rigby, P. W. and Staudt, L. M. (1990). A POU-domain transcription factor in early stem cells and germ cells of the mammalian embryo. *Nature* **345**, 686-692.
- Rubinfeld, B., Robbins, P., El Gamil, M., Albert, I., Porfiri, E. and Polakis, P. (1997). Stabilization of beta-catenin by genetic defects in melanoma cell lines. *Science* **275**, 1790-1792.
- Russ, A. P., Wattler, S., Colledge, W. H., Aparicio, S. A., Carlton, M. B., Pearce, J. J., Barton, S. C., Surani, M. A., Ryan, K., Nehls, M. C. et al. (2000). Eomesodermin is required for mouse trophoblast development and mesoderm formation. *Nature* **404**, 95-99.
- Salomon, D. S., Bianco, C., Ebert, A. D., Khan, N. I., de Santis, M., Normanno, N., Wechselberger, C., Seno, M., Williams, K., Sanicola, M. et al. (2000). The EGF-CFC family: novel epidermal growth factor-related proteins in development and cancer. *Endocr. Relat Cancer* **7**, 199-226.
- Satoh, S., Daigo, Y., Furukawa, Y., Kato, T., Miwa, N., Nishiwaki, T., Kawasoe, T., Ishiguro, H., Fujita, M., Tokino, T. et al. (2000). AXIN1 mutations in hepatocellular carcinomas, and growth suppression in cancer cells by virus-mediated transfer of AXIN1. *Nat. Genet.* **24**, 245-250.
- Schwartz, S., Zhang, Z., Frazer, K. A., Smit, A., Riemer, C., Bouck, J., Gibbs, R., Hardison, R. and Miller, W. (2000). PipMaker – a web server for aligning two genomic DNA sequences. *Genome Res.* **10**, 577-586.
- Shimizu, H., Julius, M. A., Giarre, M., Zheng, Z., Brown, A. M. and Kitajewski, J. (1997). Transformation by Wnt family proteins correlates with regulation of beta-catenin. *Cell Growth Differ.* **8**, 1349-1358.
- Shtutman, M., Zhurinsky, J., Simcha, I., Albanese, C., D'Amico, M., Pestell, R. and Ben Ze'ev, A. (1999). The cyclin D1 gene is a target of the beta-catenin/LEF-1 pathway. *Proc. Natl. Acad. Sci. U. S. A* **96**, 5522-5527.
- Smith, W. C. and Harland, R. M. (1991). Injected Xwnt-8 RNA acts early in *Xenopus* embryos to promote formation of a vegetal dorsalizing center. *Cell* **67**, 753-765.
- Smits, R., Kielman, M. F., Breukel, C., Zurcher, C., Neufeld, K., Jagmohan-Changur, S., Hofland, N., van Dijk, J., White, R. et al. (1999). Apc1638T: a mouse model delineating critical domains of the adenomatous polyposis coli protein involved in tumorigenesis and development. *Genes Dev.* **13**, 1309-1321.
- Sokol, S., Christian, J. L., Moon, R. T. and Melton, D. A. (1991). Injected Wnt RNA induces a complete body axis in *Xenopus* embryos. *Cell* **67**, 741-752.
- Sokol, S. Y. (1999). Wnt signaling and dorso-ventral axis specification in vertebrates. *Curr. Opin. Genet. Dev.* **9**, 405-410.
- Soshnikova, N., Zechner, D., Huelsken, J., Mishina, Y., Behringer, R. R., Taketo, M. M., Crenshaw, E. B., III and Birchmeier, W. (2003). Genetic interaction between Wnt/{beta}-catenin and BMP receptor signaling during formation of the AER and the dorsal-ventral axis in the limb. *Genes Dev.* **17**, 1963-1968.
- Struhl, G. and Basler, K. (1993). Organizing activity of wingless protein in *Drosophila*. *Cell* **72**, 527-540.
- Sun, X., Meyers, E. N., Lewandoski, M. and Martin, G. R. (1999). Targeted disruption of Fgf8 causes failure of cell migration in the gastrulating mouse embryo. *Genes Dev.* **13**, 1834-1846.
- Tetsu, O. and McCormick, F. (1999). Beta-catenin regulates expression of cyclin D1 in colon carcinoma cells. *Nature* **398**, 422-426.
- Thiagalingam, S., Lengauer, C., Leach, F. S., Schutte, M., Hahn, S. A., Overhauser, J., Willson, J. K., Markowitz, S., Hamilton, S. R., Kern, S. E. et al. (1996). Evaluation of candidate tumour suppressor genes on chromosome 18 in colorectal cancers. *Nat. Genet.* **13**, 343-346.
- Thomas, P. and Beddington, R. (1996). Anterior primitive endoderm may be responsible for patterning the anterior neural plate in the mouse embryo. *Curr. Biol.* **6**, 1487-1496.
- van de Wetering, M., Sancho, E., Verweij, C., de Lau, W., Oving, I., Hurlstone, A., van der Horn, K., Batlle, E., Coudreuse, D., Haramis, A. P. et al. (2002). The beta-Catenin/TCF-4 complex imposes a crypt progenitor phenotype on colorectal cancer cells. *Cell* **111**, 241-250.
- Varlet, I., Collignon, J. and Robertson, E. J. (1997). nodal expression in the primitive endoderm is required for specification of the anterior axis during mouse gastrulation. *Development* **124**, 1033-1044.
- Vonica, A. and Gumbiner, B. M. (2002). Zygotic Wnt activity is required for Brachyury expression in the early *Xenopus laevis* embryo. *Dev. Biol.* **250**, 112-127.
- Watanabe, M. and Whitman, M. (1999). FAST-1 is a key maternal effector of mesoderm inducers in the early *Xenopus* embryo. *Development* **126**, 5621-5634.
- Whitman, M. (2001). Nodal signaling in early vertebrate embryos: themes and variations. *Dev. Cell* **1**, 605-617.
- Wilkinson, D. G., Bhatt, S. and Herrmann, B. G. (1990). Expression pattern of the mouse T gene and its role in mesoderm formation. *Nature* **343**, 657-659.
- Willert, J., Epping, M., Pollack, J. R., Brown, P. O. and Nusse, R. (2002). A transcriptional response to Wnt protein in human embryonic carcinoma cells. *BMC. Dev. Biol.* **2**, 8.
- Yamaguchi, T. P., Takada, S., Yoshikawa, Y., Wu, N. and McMahon, A. P. (1999). T (Brachyury) is a direct target of Wnt3a during paraxial mesoderm specification. *Genes Dev.* **13**, 3185-3190.
- Yan, Y. T., Liu, J. J., Luo, Y., Haltiwanger, R. S., Abate-Shen, C. and Shen, M. M. (2002). Dual roles of Cripto as a ligand and coreceptor in the nodal signaling pathway. *Mol. Cell. Biol.* **22**, 4439-4449.
- Yeo, C. and Whitman, M. (2001). Nodal signals to Smads through Cripto-dependent and Cripto-independent mechanisms. *Mol. Cell* **7**, 949-957.
- Yost, C., Farr, G. H., III, Pierce, S. B., Ferkey, D. M., Chen, M. M. and Kimelman, D. (1998). GBP, an inhibitor of GSK-3, is implicated in *Xenopus* development and oncogenesis. *Cell* **93**, 1031-1041.
- Zhang, Y., Feng, X., We, R. and Derynck, R. (1996). Receptor-associated Mad homologues synergize as effectors of the TGF-beta response. *Nature* **383**, 168-172.
